# Supplementary material for: Improving semi-automated glacier mapping with a multi-method approach: applications in central Asia
Source: Copernicus journal article supplement (doi:10.5194/tc-9-1747-2015), 2015-09-04
Supplement: Supplementary file 1 [file tc-9-1747-2015-supplement.zip]

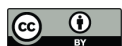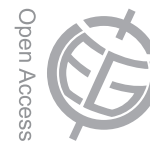

## *Supplement of*

# **Improving semi-automated glacier mapping with a multi-method approach: applications in central Asia**

**T. Smith et al.**

*Correspondence to:* T. Smith ([tsmith@uni-potsdam.de](mailto:tsmith@uni-potsdam.de))

- tc-9-1747-2015-supplement-title-page.pdf
- Example\_Threshold\_File.csv
- Extract.conf
- Glacier\_Extraction.m
- Glacier\_Outline\_Extraction\_v0.3.py
- Readme\_Windows.txt
- Vertex\_Comparison\_v0.1.py
- Vertex\_Example.conf

The copyright of individual parts of the supplement might differ from the CC-BY 3.0 licence.
